# Supplementary material for: Long-read genome assembly of the insect model organism Tribolium castaneum reveals spread of satellite DNA in gene-rich regions by recurrent burst events
Source: HighWire-hosted journal article supplement (doi:10.1101/gr.279225.124), 2024-10-22
Supplement: Supplemental_Table_S1.xlsx [file Supplemental_Table_S1.xlsx]

## Sheet: 1_Nanoplot
Supplementary table 1. Statistics of long reads sequenced with Oxford Nanopore Technologies analyzed with Nanoplot. Below the table is the read lengths distribution.
Mean read length:	15799.3
Mean read quality:	12.8
Median read length:	11768
Median read quality:	12.9
Number of reads:	5688065
Read length N50:	20119
STDEV read length:	11872.4
Total bases:	89867276950
>Q10:	0.889
>Q12:	0.657
>Q15:	0.155
# reads (>= 0 bp)	5688065
# reads (>= 1000 bp)	5076810
# reads (>= 5000 bp)	4123341
# reads (>= 10000 bp)	3395112
# reads (>= 25000 bp)	945171
# reads (>= 50000 bp)	117567
Total length (>= 0 bp)	89867276950
Total length (>= 1000 bp)	86515280369
Total length (>= 5000 bp)	83196677762
Total length (>= 10000 bp)	73362556790
Total length (>= 25000 bp)	35294400317
Total length (>= 50000 bp)	7263554761
