# Supplementary material for: Long-read genome assembly of the insect model organism Tribolium castaneum reveals spread of satellite DNA in gene-rich regions by recurrent burst events
Source: HighWire-hosted journal article supplement (doi:10.1101/gr.279225.124), 2024-10-22
Supplement: Supplemental_Table_S2.xlsx [file Supplemental_Table_S2.xlsx]

## Sheet: 2_Canu
Supplementary table 2. Overview of Canu assembly output together with subsequent contig filtering for RagTag orientation using Tcas5.2 reference assembly. Shown together are the final contigs that were successfully assigned to chromosomes and represent the assembled part of the T. castaneum ONT assembly.
	All Canu contigs	Filtered Canu contigs based on gene presence and orientated with RagTag	Contigs sucessfully assigned to chromosomes
# contigs (>= 0 bp)	1479	471	244
# contigs (>= 1000 bp)	1479	471	244
# contigs (>= 5000 bp)	1479	471	244
# contigs (>= 10000 bp)	1479	471	244
# contigs (>= 25000 bp)	1466	471	244
# contigs (>= 50000 bp)	1288	464	241
Total length (>= 0 bp)	321044737	223451783	189223737
Total length (>= 1000 bp)	321044737	223451783	189223737
Total length (>= 5000 bp)	321044737	223451783	189223737
Total length (>= 10000 bp)	321044737	223451783	189223737
Total length (>= 25000 bp)	320743788	223451783	189223737
Total length (>= 50000 bp)	313409266	223143008	189081091
# contigs	1479	471	244
Largest contig	16371545	16371545	16371545
Total length	321044737	223451783	189223737
GC (%)	31.21	33.01	33.37
N50	835545	3660290	5280288
N90	76926	114221	218032
auN	3.75773e+06	5.33522e+06	6.24962e+06
L50	45	15	11
L90	903	205	65
# N's per 100 kbp	0	0	0
