# Supplementary material for: Long-read genome assembly of the insect model organism Tribolium castaneum reveals spread of satellite DNA in gene-rich regions by recurrent burst events
Source: HighWire-hosted journal article supplement (doi:10.1101/gr.279225.124), 2024-10-22
Supplement: Supplemental_Table_S3.xlsx [file Supplemental_Table_S3.xlsx]

## Sheet: 3_Size
Supplementary table 3. T. castaneum genome size estimation using two software; findGSE (Sun et al., 2918) and CovEST (Hozza et al., 2015). The analyses were performed on Canu corrected reads according to the recommendations and with a k-mer size of 31.
	Estimated genome size (bp)
findGSE	203772508
CovEST RE	208366566
	Repeat ratio
findGSE	0.27
