# Supplementary material for: Long-read genome assembly of the insect model organism Tribolium castaneum reveals spread of satellite DNA in gene-rich regions by recurrent burst events
Source: HighWire-hosted journal article supplement (doi:10.1101/gr.279225.124), 2024-10-22
Supplement: Supplemental_Table_S4.xlsx [file Supplemental_Table_S4.xlsx]

## Sheet: 4_Gaps
Supplementary table 4. Comparison of assembly gaps in the reference Tcas5.2 assembly and after gap filling step with Canu corrected reads larger than 20 kb (in detail depicted in Supplementary figure 1).
	Original Tcas5.2 assembly	Gap_filled Tcas5.2 assembly	Gap difference	Gap difference (%)
Gap number (N>10)	3669	62	3607	98.3102
Total N size	11495702	991852	10503850
1st quantile	81	41
Median gap size	381	91
3rd quantile	1081	98
Maximal gap size	1200301	248621
Mean gap size	3125	15997
