# Supplementary material for: Long-read genome assembly of the insect model organism Tribolium castaneum reveals spread of satellite DNA in gene-rich regions by recurrent burst events
Source: HighWire-hosted journal article supplement (doi:10.1101/gr.279225.124), 2024-10-22
Supplement: Supplemental_Table_S5.xlsx [file Supplemental_Table_S5.xlsx]

## Sheet: 5_RagTag conf scores
Supplementary table 5. Orientation scores obtained by RagTag algorithm used for positioning of 244 contigs that were placed into ten T. castaneum chromosomes.
query	grouping_confidence	location_confidence	orientation_confidence
tig00000477	1	1	1
tig00000478	1	1	1
tig00000479	1	1	1
tig00001230	1	1	1
tig00000119	1	1	1
tig00000125	1	1	1
tig00001150	1	1	1
tig00001098	0.927628	0.936615	0.983775
tig00000124	1	1	1
tig00000412	0.951762	1	1
tig00000435	0.644852	0.0138718	1
tig00000121	1	1	1
tig00000120	1	1	1
tig00001229	0.997863	0.929791	1
tig00000122	1	1	1
tig00000123	0.93723	1	1
tig00000668	1	1	1
tig00000670	0.651559	0.991314	1
tig00001534	0.683004	0.166421	0.960538
tig00000663	1	1	1
tig00001440	0.987269	0.517179	0.546155
tig00001130	0.99793	1	1
tig00000352	0.990259	0.941723	1
tig00000503	0.44711	0.00168996	0.963111
tig00001285	0.294979	0.00338269	0.944787
tig00000368	1	1	1
tig00000375	1	1	1
tig00000372	1	1	1
tig00000366	1	1	1
tig00000374	1	1	1
tig00000370	1	1	1
tig00000364	1	1	1
tig00001254	1	1	1
tig00000172	1	1	1
tig00001262	1	1	1
tig00001263	0.811583	1	1
tig00000183	0.921189	0.0597055	1
tig00000194	1	1	1
tig00000192	1	1	1
tig00001244	0.938591	0.446862	0.969738
tig00001806	1	1	1
tig00001004	1	1	1
tig00000149	1	1	1
tig00000171	1	1	1
tig00000193	1	0.95571	0.982524
tig00000160	1	0.999361	1
tig00000189	1	1	1
tig00000166	1	1	1
tig00000141	1	1	1
tig00000163	1	1	1
tig00001245	0.989579	0.0890136	0.77136
tig00000154	1	1	1
tig00001200	0.897616	0.00266992	0.605947
tig00001113	0.655032	1	0.968854
tig00000036	0.76743	1	0.766392
tig00001246	0.897471	0.0824853	0.984425
tig00001078	0.988652	0.0104621	0.9569
tig00000053	0.947597	0.00488983	1
tig00001159	0.997447	0.130417	0.998693
tig00000202	0.771418	1	1
tig00000318	0.825096	1	1
tig00000209	1	1	1
tig00000205	0.560204	1	1
tig00000296	1	1	1
tig00000312	0.67455	0.000300114	1
tig00000282	1	1	1
tig00000274	1	1	1
tig00001079	1	0.322686	0.997784
tig00000047	1	1	1
tig00000040	1	0.139063	1
tig00000041	1	1	1
tig00001081	1	1	1
tig00001082	0.957502	0.184619	0.402122
tig00000273	1	1	1
tig00000290	1	1	1
tig00000284	1	1	1
tig00000293	1	1	1
tig00000294	1	1	1
tig00000275	0.978331	0.95271	0.973434
tig00000302	1	1	1
tig00001083	0.941436	0.0798327	0.726014
tig00000164	1	1	1
tig00000142	1	1	1
tig00000300	1	1	1
tig00000301	1	1	1
tig00000306	1	1	1
tig00000672	0.472888	1	1
tig00001084	1	1	1
tig00001085	0.849397	1	1
tig00000313	0.594544	1	1
tig00001086	0.771826	0.0257277	0.991327
tig00001242	0.677809	0.0117705	1
tig00000461	0.842572	1	1
tig00001241	0.994736	0.721142	1
tig00001228	0.954374	0.460682	0.996177
tig00001087	1	0.986671	0.984132
tig00000464	1	1	1
tig00001089	1	1	1
tig00000473	1	1	1
tig00000474	1	1	1
tig00001297	0.837883	1	1
tig00000418	1	1	1
tig00001076	1	1	0.970457
tig00001074	0.819748	1	1
tig00001843	0.982868	0.98926	1
tig00000422	0.597268	1	1
tig00000416	1	1	1
tig00000411	1	1	1
tig00000410	1	1	1
tig00001464	0.629738	0.00493928	0.938917
tig00000324	1	1	1
tig00000326	1	1	1
tig00000328	1	1	1
tig00001106	0.791929	0.98017	1
tig00001107	1	0.907566	1
tig00000263	0.905775	0.999955	1
tig00001108	0.997529	0.921636	1
tig00000242	0.54712	1	1
tig00000255	1	1	1
tig00000256	1	1	1
tig00000298	0.818182	1	1
tig00000269	1	1	1
tig00001109	1	1	1
tig00000231	1	1	1
tig00000230	0.99882	0.985686	1
tig00001279	0.976158	0.821966	1
tig00001306	1	1	1
tig00000514	0.652372	0.542686	0.999015
tig00001095	1	1	1
tig00000080	1	1	1
tig00001148	1	0.999929	1
tig00001163	1	0.999435	1
tig00001162	1	1	1
tig00001166	1	1	1
tig00001146	1	1	1
tig00000068	1	1	1
tig00000078	1	1	1
tig00001164	1	1	1
tig00001165	1	1	1
tig00001160	0.502627	1	1
tig00000071	1	1	1
tig00000077	1	1	1
tig00000063	1	0.566713	0.896668
tig00000060	1	1	1
tig00000069	1	1	1
tig00000072	1	1	1
tig00000055	1	1	1
tig00001145	0.843874	0.955197	0.845479
tig00001820	0.938016	1	1
tig00001031	0.580866	1	0.81066
tig00000135	0.995254	0.339767	0.954522
tig00000138	0.994952	0.312465	0.955364
tig00001011	0.511262	1	1
tig00001110	0.98613	0.930499	1
tig00000140	1	1	1
tig00000236	1	1	1
tig00001256	0.962092	0.980283	0.988841
tig00000246	1	1	1
tig00000341	1	1	1
tig00000340	1	1	1
tig00000344	1	0.999975	1
tig00001338	1	1	1
tig00000351	1	1	1
tig00000354	1	1	1
tig00000356	1	1	1
tig00000355	1	1	1
tig00000350	1	1	1
tig00000349	0.840895	1	1
tig00000630	0.398062	0.0111475	0.986478
tig00000460	0.220352	0.0103748	0.891048
tig00000545	1	0.283585	0.552534
tig00001546	0.507163	0.0110592	0.68426
tig00000495	0.935026	0.00576523	0.950385
tig00001265	1	1	1
tig00001264	1	1	1
tig00000391	0.995154	0.810351	0.935684
tig00001249	0.557467	0.777298	0.584129
tig00000403	1	1	1
tig00000396	1	1	1
tig00000394	1	1	1
tig00000393	1	0.999892	1
tig00000402	1	1	1
tig00000399	1	1	1
tig00000397	1	1	1
tig00000311	0.996458	1	1
tig00000390	1	1	1
tig00000389	1	1	1
tig00000386	1	1	1
tig00000387	1	1	1
tig00000385	1	1	1
tig00000380	1	1	1
tig00001172	1	1	1
tig00000383	1	1	1
tig00000228	0.52526	1	1
tig00000178	0.532001	1	1
tig00000369	1	0.897214	1
tig00001154	0.998668	0.858934	0.999655
tig00000377	1	1	1
tig00001155	0.99863	1	1
tig00001284	0.455913	0.0251309	0.620172
tig00000499	1	0.999042	0.998886
tig00000004	0.811065	0.0315039	0.997992
tig00001116	0.892864	0.0982337	0.997691
tig00000519	1	0.418066	0.524387
tig00001137	0.800789	0.0850325	0.580847
tig00001115	0.658276	0.0227142	0.88116
tig00001121	0.683067	0.0199299	0.925142
tig00001114	1	1	1
tig00000012	1	1	1
tig00000513	1	0.182588	0.8134
tig00001312	1	1	1
tig00001311	1	1	1
tig00000483	0.98601	0.993579	1
tig00000481	1	1	1
tig00000488	0.942925	0.925118	1
tig00000489	1	1	1
tig00001175	1	1	1
tig00000108	1	1	1
tig00000115	0.998684	0.139595	1
tig00000111	1	1	1
tig00000106	1	1	1
tig00000104	0.960902	1	1
tig00000103	1	1	1
tig00000096	1	1	1
tig00000097	1	1	1
tig00000087	1	1	1
tig00001171	0.998955	0.814482	0.982364
tig00000317	1	0.999962	1
tig00001243	1	1	1
tig00000225	1	1	1
tig00001247	0.848784	0.763657	0.299824
tig00000502	0.734143	1	1
tig00001321	0.282119	0.0575185	0.941314
tig00000210	1	0.0488179	0.664769
tig00001117	0.815077	0.449527	0.603532
tig00001119	0.806292	0.778132	0.627591
tig00000221	0.943407	0.0464852	1
tig00000223	1	0.980264	0.965035
tig00001118	0.519177	0.218555	0.741491
tig00001293	1	1	1
tig00001272	0.981876	0.562463	0.523715
tig00001273	1	1	1
tig00001092	0.662988	0.146144	0.973136
tig00001292	1	0.0862776	0.846157
