# Supplementary material for: Long-read genome assembly of the insect model organism Tribolium castaneum reveals spread of satellite DNA in gene-rich regions by recurrent burst events
Source: HighWire-hosted journal article supplement (doi:10.1101/gr.279225.124), 2024-10-22
Supplement: Supplemental_Table_S6.xlsx [file Supplemental_Table_S6.xlsx]

## Sheet: 6_Contigs repeats
Supplementary table 6. Distribution of satellites and genes within the 471 contigs used for RagTag orientation.
Contig name	Contig length (bp)	Satellite occupancy (%)	Gene occupancy (%)	Contig status in final ONT assembly	Total length of placed contigs (bp)	Total length of unplaced contigs (bp)	Total length of unplaced contigs with >50% satellite (bp)
tig00001249	202992	53.3164	0.664066	Final assembly	189223737	34228046	14203550
tig00001150	64053	40.4353	5.22692	Final assembly
tig00001200	715149	38.5755	0.286793	Final assembly
tig00000106	105261	28.9613	29.9427	Final assembly
tig00000479	78317	27.6888	8.93931	Final assembly
tig00001285	844215	20.1534	28.1804	Final assembly
tig00001321	4064624	17.4954	25.8895	Final assembly
tig00001230	69590	15.5353	34.367	Final assembly
tig00000141	163001	15.2011	43.4936	Final assembly
tig00000341	80874	15.0592	9.13025	Final assembly
tig00001247	2191239	14.3836	53.5949	Final assembly
tig00000393	181067	10.2647	31.7203	Final assembly
tig00001095	425567	8.59489	45.1327	Final assembly
tig00000368	162640	7.58669	11.4793	Final assembly
tig00000205	86465	7.54988	6.0857	Final assembly
tig00001256	16371545	6.0899	67.5409	Final assembly
tig00001106	5280288	5.59956	67.616	Final assembly
tig00000123	76509	5.59281	9.35707	Final assembly
tig00001078	184875	5.30845	6.00622	Final assembly
tig00000080	103974	5.22342	30.5019	Final assembly
tig00000104	122215	5.0583	74.3886	Final assembly
tig00000189	133676	4.86998	51.7026	Final assembly
tig00000380	161644	4.38556	15.1363	Final assembly
tig00000183	99041	3.75703	38.8294	Final assembly
tig00000389	112242	3.49691	14.7627	Final assembly
tig00001843	11279182	3.30624	66.3893	Final assembly
tig00001534	1266074	3.19776	25.6671	Final assembly
tig00000053	72083	3.04788	41.3773	Final assembly
tig00000097	108760	2.85399	6.47757	Final assembly
tig00001171	13335735	2.75744	72.6237	Final assembly
tig00001098	6643062	2.68825	69.194	Final assembly
tig00001229	2431020	2.43219	67.5964	Final assembly
tig00001148	1963873	2.41243	80.7805	Final assembly
tig00000435	146430	1.98183	3.7465	Final assembly
tig00001108	5621849	1.77904	63.6798	Final assembly
tig00000391	4986065	1.68243	62.4834	Final assembly
tig00001145	6796095	1.67498	58.6405	Final assembly
tig00001172	61547	1.51104	22.8996	Final assembly
tig00000115	103718	1.49637	11.0241	Final assembly
tig00000263	109438	1.41907	7.4444	Final assembly
tig00000096	112155	1.39182	31.3209	Final assembly
tig00001107	3660290	1.36566	76.4591	Final assembly
tig00001245	2242019	1.35614	55.877	Final assembly
tig00000352	7546636	1.34443	75.5708	Final assembly
tig00000385	117287	1.32154	47.2968	Final assembly
tig00001119	4920069	1.25699	71.4632	Final assembly
tig00000369	209279	1.22659	34.7197	Final assembly
tig00001118	1742344	1.14352	63.1975	Final assembly
tig00001154	6364958	0.845944	72.6606	Final assembly
tig00000078	127584	0.751662	6.39814	Final assembly
tig00001130	5488169	0.720422	64.8861	Final assembly
tig00001244	12783081	0.669768	75.973	Final assembly
tig00001081	298804	0.631518	59.2703	Final assembly
tig00001159	1577151	0.597343	69.2802	Final assembly
tig00001083	2145271	0.527859	61.2664	Final assembly
tig00001246	2296785	0.493429	69.0761	Final assembly
tig00001082	3520765	0.304621	60.213	Final assembly
tig00001092	922934	0.281277	63.6547	Final assembly
tig00001109	906841	0.271933	66.8496	Final assembly
tig00000422	160869	0.224406	5.95951	Final assembly
tig00001117	835545	0.172941	58.7822	Final assembly
tig00000221	218032	0.149061	2.16299	Final assembly
tig00001228	946280	0.113497	34.3295	Final assembly
tig00001079	2223311	0.0640486	46.7532	Final assembly
tig00001076	1736555	0.0636893	73.3695	Final assembly
tig00000004	407910	0	0.644505	Final assembly
tig00000012	88187	0	2.05246	Final assembly
tig00000036	82102	0	20.8984	Final assembly
tig00000040	119118	0	1.44311	Final assembly
tig00000041	89542	0	85.4337	Final assembly
tig00000047	124412	0	3.58165	Final assembly
tig00000055	181673	0	63.2747	Final assembly
tig00000060	116916	0	23.4553	Final assembly
tig00000063	146662	0	31.1574	Final assembly
tig00000068	97769	0	74.408	Final assembly
tig00000069	117305	0	17.3104	Final assembly
tig00000071	83113	0	2.02014	Final assembly
tig00000072	176914	0	67.023	Final assembly
tig00000077	72879	0	2.09525	Final assembly
tig00000087	85951	0	13.0807	Final assembly
tig00000103	98551	0	14.8431	Final assembly
tig00000108	83472	0	20.8154	Final assembly
tig00000111	103724	0	38.0076	Final assembly
tig00000119	92506	0	6.42445	Final assembly
tig00000120	82069	0	16.7603	Final assembly
tig00000121	82378	0	52.4436	Final assembly
tig00000122	69710	0	10.8076	Final assembly
tig00000124	84038	0	22.7742	Final assembly
tig00000125	84374	0	37.0126	Final assembly
tig00000135	101214	0	33.1515	Final assembly
tig00000138	104205	0	9.44101	Final assembly
tig00000140	74231	0	70.2968	Final assembly
tig00000142	104908	0	2.82533	Final assembly
tig00000149	142973	0	2.74038	Final assembly
tig00000154	248946	0	1.19785	Final assembly
tig00000160	123490	0	27.5747	Final assembly
tig00000163	100238	0	17.1013	Final assembly
tig00000164	96690	0	27.2272	Final assembly
tig00000166	93915	0	45.9522	Final assembly
tig00000171	109996	0	14.3878	Final assembly
tig00000172	73824	0	5.97096	Final assembly
tig00000178	67454	0	24.0727	Final assembly
tig00000192	69844	0	6.50736	Final assembly
tig00000193	81321	0	4.69006	Final assembly
tig00000194	82855	0	20.595	Final assembly
tig00000202	167080	0	26.874	Final assembly
tig00000209	94285	0	34.0436	Final assembly
tig00000210	185399	0	0.776703	Final assembly
tig00000223	113944	0	2.74082	Final assembly
tig00000225	61969	0	16.2065	Final assembly
tig00000228	206185	0	1.32211	Final assembly
tig00000230	1112037	0	70.0098	Final assembly
tig00000231	78963	0	91.2985	Final assembly
tig00000236	115144	0	43.5142	Final assembly
tig00000242	93674	0	17.8139	Final assembly
tig00000246	86573	0	40.7067	Final assembly
tig00000255	79030	0	17.3529	Final assembly
tig00000256	89639	0	10.4073	Final assembly
tig00000269	81152	0	4.46693	Final assembly
tig00000273	93872	0	15.5254	Final assembly
tig00000274	130688	0	12.1266	Final assembly
tig00000275	87741	0	41.5895	Final assembly
tig00000282	104692	0	41.4884	Final assembly
tig00000284	295212	0	1.60596	Final assembly
tig00000290	117884	0	32.6813	Final assembly
tig00000293	78469	0	22.6115	Final assembly
tig00000294	166519	0	23.2274	Final assembly
tig00000296	83120	0	45.7327	Final assembly
tig00000298	130337	0	7.53508	Final assembly
tig00000300	99488	0	57.7215	Final assembly
tig00000301	88416	0	13.8934	Final assembly
tig00000302	187388	0	33.04	Final assembly
tig00000306	129249	0	5.14433	Final assembly
tig00000311	198376	0	16.6976	Final assembly
tig00000312	142779	0	32.6918	Final assembly
tig00000313	77417	0	55.9322	Final assembly
tig00000317	593677	0	85.183	Final assembly
tig00000318	111523	0	49.8749	Final assembly
tig00000324	63667	0	51.7144	Final assembly
tig00000326	80794	0	6.05119	Final assembly
tig00000328	87578	0	8.15045	Final assembly
tig00000340	74499	0	48.6302	Final assembly
tig00000344	113023	0	1.78105	Final assembly
tig00000349	77849	0	5.62114	Final assembly
tig00000350	143005	0	38.1693	Final assembly
tig00000351	85428	0	49.0331	Final assembly
tig00000354	73098	0	61.7199	Final assembly
tig00000355	88252	0	4.09962	Final assembly
tig00000356	79423	0	19.7839	Final assembly
tig00000364	95487	0	28.9537	Final assembly
tig00000366	93738	0	4.09332	Final assembly
tig00000370	82474	0	20.969	Final assembly
tig00000372	81613	0	1.93597	Final assembly
tig00000374	78223	0	18.3015	Final assembly
tig00000375	75926	0	4.82443	Final assembly
tig00000377	98562	0	19.5055	Final assembly
tig00000383	78729	0	3.08654	Final assembly
tig00000386	106469	0	20.1721	Final assembly
tig00000387	112678	0	47.145	Final assembly
tig00000390	127157	0	13.2867	Final assembly
tig00000394	104747	0	39.0341	Final assembly
tig00000396	115591	0	7.51529	Final assembly
tig00000397	73821	0	9.65308	Final assembly
tig00000399	98043	0	7.82616	Final assembly
tig00000402	99939	0	15.8837	Final assembly
tig00000403	138167	0	1.06031	Final assembly
tig00000410	84497	0	12.43	Final assembly
tig00000411	76132	0	21.1738	Final assembly
tig00000412	76762	0	12.2417	Final assembly
tig00000416	87565	0	4.95518	Final assembly
tig00000418	88189	0	4.74662	Final assembly
tig00000460	801972	0	8.1337	Final assembly
tig00000461	162033	0	33.1031	Final assembly
tig00000464	123410	0	59.9724	Final assembly
tig00000473	114221	0	4.0693	Final assembly
tig00000474	98592	0	17.0846	Final assembly
tig00000477	67705	0	29.568	Final assembly
tig00000478	77005	0	1.53237	Final assembly
tig00000481	163715	0	20.1332	Final assembly
tig00000483	104527	0	20.0341	Final assembly
tig00000488	109881	0	44.3061	Final assembly
tig00000489	94010	0	35.5356	Final assembly
tig00000495	56730	0	8.24432	Final assembly
tig00000499	104008	0	0.998962	Final assembly
tig00000502	86677	0	12.7266	Final assembly
tig00000503	122566	0	31.6874	Final assembly
tig00000513	387201	0	41.1128	Final assembly
tig00000514	353143	0	36.9437	Final assembly
tig00000519	540479	0	52.3826	Final assembly
tig00000545	89242	0	4.47771	Final assembly
tig00000630	103648	0	3.16552	Final assembly
tig00000663	73154	0	2.99642	Final assembly
tig00000668	109054	0	16.4047	Final assembly
tig00000670	385409	0	1.72077	Final assembly
tig00000672	190074	0	1.73354	Final assembly
tig00001004	99481	0	2.22354	Final assembly
tig00001011	69011	0	12.6357	Final assembly
tig00001031	162065	0	2.54219	Final assembly
tig00001074	53946	0	17.258	Final assembly
tig00001084	54700	0	14.4973	Final assembly
tig00001085	1125725	0	67.9861	Final assembly
tig00001086	1215532	0	54.0977	Final assembly
tig00001087	774633	0	32.7825	Final assembly
tig00001089	139911	0	38.5795	Final assembly
tig00001110	1662152	0	60.5394	Final assembly
tig00001113	871886	0	44.5951	Final assembly
tig00001114	134681	0	2.81777	Final assembly
tig00001115	753872	0	4.15681	Final assembly
tig00001116	1149083	0	63.5931	Final assembly
tig00001121	703386	0	53.8406	Final assembly
tig00001137	1681977	0	23.9552	Final assembly
tig00001146	104362	0	43.4229	Final assembly
tig00001155	1716042	0	72.8284	Final assembly
tig00001160	48355	0	14.5755	Final assembly
tig00001162	45736	0	27.6391	Final assembly
tig00001163	100722	0	6.49113	Final assembly
tig00001164	52285	0	6.69217	Final assembly
tig00001165	115092	0	7.60956	Final assembly
tig00001166	85739	0	20.4936	Final assembly
tig00001175	134583	0	12.2437	Final assembly
tig00001241	916700	0	78.3766	Final assembly
tig00001242	81485	0	5.74952	Final assembly
tig00001243	211169	0	59.3567	Final assembly
tig00001254	93472	0	7.83657	Final assembly
tig00001262	81914	0	13.4336	Final assembly
tig00001263	124962	0	21.0128	Final assembly
tig00001264	93120	0	10.3415	Final assembly
tig00001265	48555	0	7.77263	Final assembly
tig00001272	660651	0	73.2418	Final assembly
tig00001273	291379	0	48.8271	Final assembly
tig00001279	905038	0	59.2314	Final assembly
tig00001284	1495325	0	31.0624	Final assembly
tig00001292	82812	0	6.65	Final assembly
tig00001293	87011	0	16.6025	Final assembly
tig00001297	211024	0	38.3032	Final assembly
tig00001306	264753	0	52.643	Final assembly
tig00001311	100434	0	1.45867	Final assembly
tig00001312	75784	0	11.5684	Final assembly
tig00001338	64206	0	8.51634	Final assembly
tig00001440	1567878	0	67.9429	Final assembly
tig00001464	336888	0	0.684797	Final assembly
tig00001546	627080	0	12.2415	Final assembly
tig00001806	78956	0	2.1075	Final assembly
tig00001820	70295	0	2.88214	Final assembly
tig00001168	107370	81.5954	5.12713	Unplaced assembly
tig00001661	116514	78.1503	1.61268	Unplaced assembly
tig00001210	176808	77.2499	0.607439	Unplaced assembly
tig00001607	237164	73.6693	0.792279	Unplaced assembly
tig00001401	319825	72.9846	2.27656	Unplaced assembly
tig00001384	158344	71.68	2.47878	Unplaced assembly
tig00000804	640160	71.1571	0.657648	Unplaced assembly
tig00001211	67018	70.584	7.54126	Unplaced assembly
tig00000543	75297	70.2511	1.42635	Unplaced assembly
tig00001217	517256	70.1177	0.260606	Unplaced assembly
tig00001019	170539	68.0888	3.67482	Unplaced assembly
tig00000803	141643	68.0274	1.32657	Unplaced assembly
tig00000985	245310	67.8802	0.76597	Unplaced assembly
tig00000749	146502	67.7718	1.29282	Unplaced assembly
tig00000585	651258	67.71	0.227099	Unplaced assembly
tig00001123	375950	67.509	1.51908	Unplaced assembly
tig00001239	612206	66.5268	0.508489	Unplaced assembly
tig00001547	279211	66.295	0.898604	Unplaced assembly
tig00001124	156082	66.1985	0.820722	Unplaced assembly
tig00001552	217326	65.1008	3.30195	Unplaced assembly
tig00001402	253796	64.6846	1.22618	Unplaced assembly
tig00001612	282124	64.5978	1.28383	Unplaced assembly
tig00001738	130346	64.0618	1.86427	Unplaced assembly
tig00001184	719039	63.8141	0.305408	Unplaced assembly
tig00001627	714629	63.7443	0.20906	Unplaced assembly
tig00001574	101642	63.3567	2.39074	Unplaced assembly
tig00000724	432183	62.7736	0.375535	Unplaced assembly
tig00001556	693092	62.6793	0.207765	Unplaced assembly
tig00000894	137426	62.0305	2.52063	Unplaced assembly
tig00001377	388594	61.8808	0.800836	Unplaced assembly
tig00000832	139487	61.5986	6.59345	Unplaced assembly
tig00000656	468470	61.3794	0.674109	Unplaced assembly
tig00001169	349173	61.1207	0.706813	Unplaced assembly
tig00001259	247931	61.0392	0.84822	Unplaced assembly
tig00001335	239086	60.82	1.22676	Unplaced assembly
tig00001180	178659	60.199	0.827834	Unplaced assembly
tig00001361	84860	60.02	3.6684	Unplaced assembly
tig00001672	94224	59.3278	1.52827	Unplaced assembly
tig00001185	361726	58.2015	0.758585	Unplaced assembly
tig00001225	113781	56.7626	4.07537	Unplaced assembly
tig00001182	499300	55.8205	0.663529	Unplaced assembly
tig00000659	264988	55.2531	0.713995	Unplaced assembly
tig00001671	153612	54.8922	0.877536	Unplaced assembly
tig00001512	858853	53.9191	0.492284	Unplaced assembly
tig00001379	86819	53.8304	6.957	Unplaced assembly
tig00001673	103220	53.075	2.18465	Unplaced assembly
tig00000947	77800	52.1735	1.58612	Unplaced assembly
tig00001793	117736	51.9578	1.36322	Unplaced assembly
tig00001412	499171	50.7321	0.279463	Unplaced assembly
tig00001721	185949	49.4948	1.2853	Unplaced assembly
tig00001295	165197	49.0027	0.654976	Unplaced assembly
tig00001602	85658	48.5034	2.83686	Unplaced assembly
tig00000901	165256	47.9656	1.26591	Unplaced assembly
tig00000783	454939	47.5527	0.734604	Unplaced assembly
tig00001692	121422	45.5231	1.73198	Unplaced assembly
tig00000887	103213	37.6425	2.35435	Unplaced assembly
tig00001144	277781	36.7156	0.527394	Unplaced assembly
tig00000800	30779	35.6184	7.89499	Unplaced assembly
tig00001601	50791	34.7404	4.75281	Unplaced assembly
tig00000027	88117	25.81	6.03856	Unplaced assembly
tig00000434	102941	18.6359	7.44116	Unplaced assembly
tig00000148	103051	17.4486	22.0231	Unplaced assembly
tig00000425	147682	16.2559	41.3388	Unplaced assembly
tig00000250	73822	16.1036	38.7486	Unplaced assembly
tig00001641	90051	13.6945	3.22817	Unplaced assembly
tig00000338	105940	8.27921	19.6196	Unplaced assembly
tig00000245	104107	6.85064	12.0722	Unplaced assembly
tig00001608	330533	5.67629	2.17164	Unplaced assembly
tig00000110	69827	5.3475	28.6035	Unplaced assembly
tig00000214	93051	5.20897	20.3534	Unplaced assembly
tig00000254	75369	4.94368	13.069	Unplaced assembly
tig00000243	108049	4.60069	21.1265	Unplaced assembly
tig00000421	81067	3.56125	54.9101	Unplaced assembly
tig00001493	708200	1.69274	28.6018	Unplaced assembly
tig00000414	87668	1.2593	29.8627	Unplaced assembly
tig00000098	78941	0.936142	51.4486	Unplaced assembly
tig00001252	68013	0.473439	12.3006	Unplaced assembly
tig00000099	94483	0.381021	13.938	Unplaced assembly
tig00000162	85304	0.376301	113.146	Unplaced assembly
tig00000005	106363	0	3.82464	Unplaced assembly
tig00000010	70878	0	9.06346	Unplaced assembly
tig00000015	108233	0	1.45797	Unplaced assembly
tig00000017	74873	0	9.57755	Unplaced assembly
tig00000020	91945	0	67.2804	Unplaced assembly
tig00000021	112451	0	1.01644	Unplaced assembly
tig00000025	85816	0	26.7817	Unplaced assembly
tig00000030	83620	0	6.75078	Unplaced assembly
tig00000034	62140	0	22.8355	Unplaced assembly
tig00000039	247330	0	31.6334	Unplaced assembly
tig00000044	122344	0	0.947329	Unplaced assembly
tig00000045	97006	0	2.58644	Unplaced assembly
tig00000046	234079	0	0.618595	Unplaced assembly
tig00000083	63240	0	12.5806	Unplaced assembly
tig00000084	57236	0	31.0242	Unplaced assembly
tig00000085	72879	0	6.45453	Unplaced assembly
tig00000092	152602	0	23.8424	Unplaced assembly
tig00000093	87327	0	39.9132	Unplaced assembly
tig00000095	67560	0	12.2765	Unplaced assembly
tig00000127	64107	0	44.9062	Unplaced assembly
tig00000139	104087	0	28.3907	Unplaced assembly
tig00000145	144136	0	5.93953	Unplaced assembly
tig00000147	87190	0	17.7383	Unplaced assembly
tig00000176	89550	0	26.4992	Unplaced assembly
tig00000180	84392	0	36.4217	Unplaced assembly
tig00000187	84642	0	31.5588	Unplaced assembly
tig00000201	76926	0	15.3329	Unplaced assembly
tig00000213	77758	0	3.35271	Unplaced assembly
tig00000217	345276	0	67.0322	Unplaced assembly
tig00000218	77574	0	30.7706	Unplaced assembly
tig00000219	88124	0	7.9025	Unplaced assembly
tig00000226	86344	0	8.63291	Unplaced assembly
tig00000234	88869	0	4.80483	Unplaced assembly
tig00000239	89660	0	2.42025	Unplaced assembly
tig00000244	92526	0	4.88187	Unplaced assembly
tig00000248	96904	0	11.371	Unplaced assembly
tig00000249	118321	0	7.33344	Unplaced assembly
tig00000252	97502	0	78.661	Unplaced assembly
tig00000259	108031	0	15.8029	Unplaced assembly
tig00000265	94516	0	62.5111	Unplaced assembly
tig00000267	88774	0	87.6202	Unplaced assembly
tig00000271	168029	0	5.53892	Unplaced assembly
tig00000283	109338	0	29.524	Unplaced assembly
tig00000288	80612	0	48.7248	Unplaced assembly
tig00000289	58975	0	35.1149	Unplaced assembly
tig00000295	144071	0	68.183	Unplaced assembly
tig00000304	102115	0	43.9935	Unplaced assembly
tig00000308	88424	0	1.70655	Unplaced assembly
tig00000322	147283	0	36.6288	Unplaced assembly
tig00000325	116164	0	44.9141	Unplaced assembly
tig00000334	102418	0	47.5932	Unplaced assembly
tig00000335	90023	0	2.21166	Unplaced assembly
tig00000358	78569	0	36.8288	Unplaced assembly
tig00000362	87218	0	9.64709	Unplaced assembly
tig00000363	121205	0	5.89827	Unplaced assembly
tig00000367	78672	0	9.92348	Unplaced assembly
tig00000381	75061	0	5.71002	Unplaced assembly
tig00000382	105076	0	17.6663	Unplaced assembly
tig00000384	121125	0	80.0231	Unplaced assembly
tig00000415	115676	0	31.6669	Unplaced assembly
tig00000419	131252	0	81.1866	Unplaced assembly
tig00000424	84265	0	1.34219	Unplaced assembly
tig00000426	86369	0	17.7541	Unplaced assembly
tig00000432	100636	0	3.02874	Unplaced assembly
tig00000433	141185	0	10.38	Unplaced assembly
tig00000436	85282	0	13.623	Unplaced assembly
tig00000441	125131	0	79.3073	Unplaced assembly
tig00000451	125740	0	1.8753	Unplaced assembly
tig00000466	167315	0	13.1668	Unplaced assembly
tig00000476	82359	0	7.5778	Unplaced assembly
tig00000493	119079	0	12.752	Unplaced assembly
tig00000505	131714	0	68.2532	Unplaced assembly
tig00000506	117803	0	37.4617	Unplaced assembly
tig00000507	109720	0	30.4876	Unplaced assembly
tig00000552	55776	0	5.76054	Unplaced assembly
tig00000609	103406	0	6.82939	Unplaced assembly
tig00000625	84229	0	16.9502	Unplaced assembly
tig00000664	82292	0	19.1537	Unplaced assembly
tig00000669	78435	0	18.9443	Unplaced assembly
tig00000674	230674	0	1.65948	Unplaced assembly
tig00000694	151995	0	0.89345	Unplaced assembly
tig00000697	51810	0	2.52268	Unplaced assembly
tig00000712	205885	0	5.73961	Unplaced assembly
tig00000867	243329	0	18.2103	Unplaced assembly
tig00000983	82849	0	4.05557	Unplaced assembly
tig00000992	106212	0	6.93613	Unplaced assembly
tig00000996	62007	0	5.07523	Unplaced assembly
tig00001010	70174	0	6.60786	Unplaced assembly
tig00001025	73711	0	1.42177	Unplaced assembly
tig00001029	98258	0	10.2872	Unplaced assembly
tig00001032	80128	0	3.94119	Unplaced assembly
tig00001034	79315	0	3.98159	Unplaced assembly
tig00001041	67046	0	3.85407	Unplaced assembly
tig00001047	314847	0	3.88919	Unplaced assembly
tig00001056	106046	0	2.71297	Unplaced assembly
tig00001062	60376	0	3.63721	Unplaced assembly
tig00001063	60215	0	3.94586	Unplaced assembly
tig00001069	65261	0	4.1311	Unplaced assembly
tig00001072	81797	0	12.2841	Unplaced assembly
tig00001090	76556	0	1.34281	Unplaced assembly
tig00001120	108044	0	6.2743	Unplaced assembly
tig00001156	82809	0	2.53596	Unplaced assembly
tig00001161	72472	0	19.9236	Unplaced assembly
tig00001173	44331	0	35.7718	Unplaced assembly
tig00001174	61622	0	72.3037	Unplaced assembly
tig00001202	146021	0	0.749892	Unplaced assembly
tig00001205	98311	0	7.80279	Unplaced assembly
tig00001226	99338	0	3.75385	Unplaced assembly
tig00001227	51116	0	5.10212	Unplaced assembly
tig00001278	68816	0	53.3873	Unplaced assembly
tig00001302	62497	0	13.2662	Unplaced assembly
tig00001307	137048	0	28.7439	Unplaced assembly
tig00001351	376256	0	0.615804	Unplaced assembly
tig00001460	183334	0	3.93653	Unplaced assembly
tig00001461	433434	0	8.81795	Unplaced assembly
tig00001465	134406	0	1.41735	Unplaced assembly
tig00001475	102695	0	2.03028	Unplaced assembly
tig00001505	70042	0	3.99046	Unplaced assembly
tig00001541	174222	0	6.71959	Unplaced assembly
tig00001542	80002	0	4.86988	Unplaced assembly
tig00001543	172982	0	2.1482	Unplaced assembly
tig00001544	133266	0	3.71738	Unplaced assembly
tig00001549	238935	0	6.16695	Unplaced assembly
tig00001550	59205	0	9.69513	Unplaced assembly
tig00001609	113820	0	5.53857	Unplaced assembly
tig00001642	44079	0	2.31856	Unplaced assembly
tig00001643	83791	0	4.54225	Unplaced assembly
tig00001644	94286	0	1.70333	Unplaced assembly
tig00001645	55446	0	3.92815	Unplaced assembly
tig00001646	66920	0	6.46444	Unplaced assembly
tig00001647	73428	0	2.96617	Unplaced assembly
tig00001648	55190	0	4.12031	Unplaced assembly
tig00001649	116706	0	5.19596	Unplaced assembly
tig00001781	72807	0	2.81841	Unplaced assembly
tig00001782	82912	0	1.26399	Unplaced assembly
tig00001783	136303	0	5.31903	Unplaced assembly
tig00001807	63592	0	2.06315	Unplaced assembly
tig00001808	87237	0	2.49665	Unplaced assembly
tig00001813	119094	0	3.38724	Unplaced assembly
tig00001814	55195	0	7.80324	Unplaced assembly
tig00001821	71757	0	5.02251	Unplaced assembly
tig00001822	80122	0	4.22356	Unplaced assembly
tig00001823	46940	0	4.63997	Unplaced assembly
tig00001831	56060	0	2.57224	Unplaced assembly
tig00001833	79687	0	4.78874	Unplaced assembly
tig00001835	76429	0	5.63399	Unplaced assembly
tig00001837	52649	0	2.03233	Unplaced assembly
tig00001838	57977	0	7.67891	Unplaced assembly
