# Supplementary material for: Long-read genome assembly of the insect model organism Tribolium castaneum reveals spread of satellite DNA in gene-rich regions by recurrent burst events
Source: HighWire-hosted journal article supplement (doi:10.1101/gr.279225.124), 2024-10-22
Supplement: Supplemental_Table_S7.xlsx [file Supplemental_Table_S7.xlsx]

## Sheet: 7_Assembly
Supplementary table 7. Comparison between the reference assembly Tcas5.2 (Herndon et al.,2020) and TcasONT, a new assembly enchanced by long nanopore reads. The differences after polishing with Racon are shown in the last column.
	Tcas5.2 assembly with unplaced	TcasONT_assembly	TcasONT_assembly_polished
total length (bp)	165944485	225311845	225897241
total chromosome length (bp)	147631796	191249928	191579864
chromosome length without gaps or Ns	136136094	189223737	189563044
GC (%)	33.86	33.01	32.99
auN	1.55936e+07	1.90952e+07	1.91323e+07
