# Supplementary material for: Long-read genome assembly of the insect model organism Tribolium castaneum reveals spread of satellite DNA in gene-rich regions by recurrent burst events
Source: HighWire-hosted journal article supplement (doi:10.1101/gr.279225.124), 2024-10-22
Supplement: Supplemental_Table_S8.xlsx [file Supplemental_Table_S8.xlsx]

## Sheet: 8_Chr_length
Supplementary table 8. Chromosome length comparison between the long-read improved TcasONT and the reference Tcas5.2 assembly of T. castaneum.
Chromosomes	Tcas5.2	TcasONT	Difference (%)
LG10	7222678	16519013	56.2766
LG2	15265516	18604846	17.9487
LG3	31381287	40533075	22.5786
LG4	12290766	13994349	12.1734
LG5	15459558	17646621	12.3937
LG6	10086398	12970738	22.2373
LG7	16482863	21226280	22.3469
LG8	14581690	16306430	10.5771
LG9	16184580	23519639	31.187
LGX	8676460	10258873	15.4248
total length (bp)	147631796	191579864	22.9398
