# Supplementary material for: Long-read genome assembly of the insect model organism Tribolium castaneum reveals spread of satellite DNA in gene-rich regions by recurrent burst events
Source: HighWire-hosted journal article supplement (doi:10.1101/gr.279225.124), 2024-10-22
Supplement: Supplemental_Table_S9.xlsx [file Supplemental_Table_S9.xlsx]

## Sheet: 9_lifted_genes
Supplementary table 9. Gene retention using LiftOff package from official Tcas5.2 gene set to TcasONT
Feature	TcasONT	Tcast_52	Retained
gene	14337	14467	99.1014
CDS	150962	153698	98.2199
exon	167786	171320	97.9372
mRNA	22267	22598	98.5353
lnc_RNA	1406	1364	103.079	*duplications
transcript	308	317	97.1609
primary_transcript	226	220	102.727	*duplications
tRNA	236	247	95.5466
