# Supplementary material for: Long-read genome assembly of the insect model organism Tribolium castaneum reveals spread of satellite DNA in gene-rich regions by recurrent burst events
Source: HighWire-hosted journal article supplement (doi:10.1101/gr.279225.124), 2024-10-22
Supplement: Supplemental_Table_S10.xlsx [file Supplemental_Table_S10.xlsx]

## Sheet: 10_Repeats
Supplementary table 10. Comparision of number and length of repetitive elements in T. castaneum TcastONT and Tcas5.2 assembly. Repeats are detected using Repbase database and RepeatMasker.
	Number of elements
	TcasONT	Tcas5.2	difference	difference (%)
DNA	45267	33970	11297	24.9564
LINE	32237	4684	27553	85.4701
LTR	14861	2593	12268	82.5516
RC	2746	1997	749	27.276
rRNA	998	346	652	65.3307
SINE	250	190	60	24
tRNA	29	26	3	10.3448
Simple_repeat	73293	36673	36620	49.9638
Low_complexity	16286	10168	6118	37.566
Unknown	789	597	192	24.3346
total	186756	91244	95512
total TEs	92615	41437	51178
	Length of elements (bp)
	TcastONT	Tcas5.2	difference	difference (%)
DNA	13499636	8279569	5220067	38.6682
LINE	16084939	1572720	14512219	90.2224
LTR	2542411	766028	1776383	69.87
RC	353694	258101	95593	27.027
rRNA	354597	50383	304214	85.7915
SINE	31176	24455	6721	21.5582
tRNA	2202	1978	224	10.1726
Simple_repeat	4030246	1662985	2367261	58.7374
Low_complexity	752292	487704	264588	35.1709
Unknown	117266	59604	57662	49.172
total	37768459	13163527	24604932
total TEs	32158162	10642772	21515390
	Total sum of tandem repeats (TR) length (bp)
Period size	Tcas5.2	TcasONT	Difference
<50	1825166	3639659	1814493
50-500	4704595	16769526	12064931
>500	2618407	14895753	12277346
total	9148168	35304938	26156770
total large	7323002	31665279	24342277
total enrichment of repetitive			50761702
