# Supplementary material for: Long-read genome assembly of the insect model organism Tribolium castaneum reveals spread of satellite DNA in gene-rich regions by recurrent burst events
Source: HighWire-hosted journal article supplement (doi:10.1101/gr.279225.124), 2024-10-22
Supplement: Supplemental_Table_S11.xlsx [file Supplemental_Table_S11.xlsx]

## Sheet: 11_Cast monomers
Supplementary table 11. Statistics of Cast1-Cast9 satDNAs abundance. SatDNA monomers were searched with BLAST and filtered based on the criteria of >75% seqeunce coverage and >70% identity (as described in Materials and Methods). Listed are the copy numbers of monomers annotated in the TcasONT and Tcas5.2 assemblies (only in assembled chromosomes) and in the corrected Nanopore reads (from Canu).
		TcastONT		Tcas5.2		Reads (corrected, 4x coverage)
	Monomer Length	Monomer number	Genome abundance (%)	Monomer number	Genome abundance (%)	Monomer number	Abunance in reads (%)	TcastONT/Tcas5.2
Cast1	172	5258	0.430655	1149	0.133867	10080	0.205396	3.21704
Cast2	172	4997	0.448629	1407	0.163926	14481	0.295073	2.73678
Cas2'	1101	2674	1.53673	302	0.225227	8129	1.06029	6.82306
Cast3	227	1292	0.153087	898	0.138079	3868	0.104019	1.10869
Cast4	179	2129	0.19892	814	0.0986967	9222	0.19556	2.01547
Cast5	334	8073	1.40744	567	0.128279	22903	0.906235	10.9718
Cast6	180	3980	0.373943	908	0.110709	12372	0.263824	3.3777
Cast7	121	1967	0.124234	301	0.0246705	49995	0.716661	5.03573
Cast8	169	534	0.0471062	248	0.0283899	1485	0.0297314	1.65926
Cast9	350	496	0.0906149	377	0.0893789	1501	0.0622373	1.01383
Total Cast			4.81137		1.14122		3.83903
