# Supplementary material for: Long-read genome assembly of the insect model organism Tribolium castaneum reveals spread of satellite DNA in gene-rich regions by recurrent burst events
Source: HighWire-hosted journal article supplement (doi:10.1101/gr.279225.124), 2024-10-22
Supplement: Supplemental_Table_S12.xlsx [file Supplemental_Table_S12.xlsx]

## Sheet: 12_K-S
Supplementary table 12. Statistical analysis of the Cast arrays and gene number interlationship, results of the one-sided Kolmogorov-Smirnov test with FDR corrected p-values for multiple testing. Cast satDNAs flanking regions having significantly (p<0.05) lower (orange) or higher (green) distirbution of genes than the average T. castaneum genome sequence.
satDNA family	Significantly less genes	Significatly more genes
Cast1	0.00498	0.803448
Cast2'	0.845014	0
Cast2	0.910113	0.171864
Cast3	0.95924	0
Cast4	0.95924	0.001228
Cast5	0.9896	0
Cast6	0.0972022	0.910113
Cast7	0	0.95924
Cast8	0.9896	0.00628571
Cast9	0.528104	0.0374625
