# Supplementary material for: Long-read genome assembly of the insect model organism Tribolium castaneum reveals spread of satellite DNA in gene-rich regions by recurrent burst events
Source: HighWire-hosted journal article supplement (doi:10.1101/gr.279225.124), 2024-10-22
Supplement: Supplemental_Table_S13.xlsx [file Supplemental_Table_S13.xlsx]

## Sheet: 13_arrays_per_mb
Supplementary table 13. Number of Cast1-Cast9 arrays per MB of chromosome length
Chromosome	Length (in MB)	Number of Cast1-Cast9arrays	N/MB
LG10	16.519	419	25.3647
LG2	18.6048	164	8.81491
LG3	40.5331	444	10.954
LG4	13.9943	131	9.36092
LG5	17.6466	209	11.8436
LG6	12.9707	274	21.1245
LG7	21.2263	299	14.0863
LG8	16.3064	358	21.9545
LG9	23.5196	269	11.4373
LGX	10.2589	98	9.55271
