# Supplementary material for: Long-read genome assembly of the insect model organism Tribolium castaneum reveals spread of satellite DNA in gene-rich regions by recurrent burst events
Source: HighWire-hosted journal article supplement (doi:10.1101/gr.279225.124), 2024-10-22
Supplement: Supplemental_Table_S14.xlsx [file Supplemental_Table_S14.xlsx]

## Sheet: 14_command line calls
Supplementary table 14. List of all software packages used in T. castaneum genome assembly with detailed description of used parameters.
Step	Software	Version	Parameters
Sequencing and basecalling	MinKnow	40350	GUI
	Guppy	5.0.11	--config dna_r10.3_450bps_hac.cfg -x cuda:0
Assembly and polishing	Canu	2.2	genomeSize=200m minReadLength=20000
			corMaxEvidenceErate=0.15 ovlMerThreshold=500 gridEngineResourceOption="-l mem=MEMORY"
	TGSGapfiller	v1.0.1	--thread 14 --min_match 500 --ne
	RagTag	v2.1.0	scaffold -f 50000 -t 16
	minimap2	r1101	-ax map-ont
	RACON	v1.4.3	default
Annotation	Liftoff	37043	-g 52.gff -chroms -copies
	RepeatMasker	4.0.9_p2	Galaxy settings: "repeat source species = hexapoda" "output=ggf"
	BUSCO	5.0.0	Galaxy settings (lineage=Insecta, Augustus species=Tribolium castaneum)
